# Supplementary material
Source: PubMed Central journal article supplement (PMC3232849)
Supplement: supp_193.24.6960_FigS2.pdf [file supp_193.24.6960_FigS2.pdf]

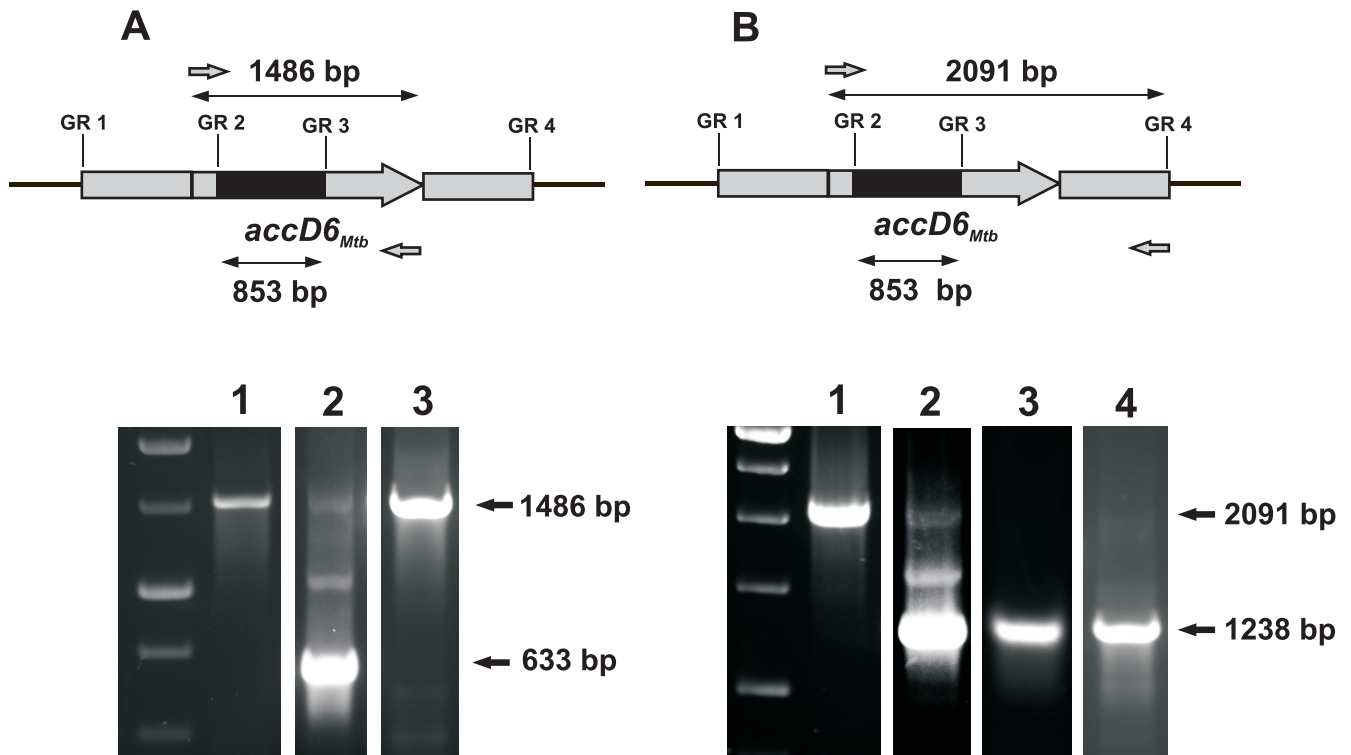

**Fig. S2** PCR-based genotyping of the *M. tuberculosis* *accD6* mutants **(A)** (top) Schematic showing the genomic orientation of the *accD6*<sub>Mtb</sub> gene (thick gray arrow). The internal deletion of *accD6* introduced using a gene replacement vector is marked with a black rectangle. GR1-GR2/GR3-GR4 denote the gene-flanking fragments that were amplified and cloned together in the p2NIL suicide vector to obtain the mutated  $\Delta accD6$  allele for gene replacement. The small gray arrows indicate the binding sites for the primers that were used for PCR-based genotyping. The thin black arrows indicate the length of the product amplified from wild-type *accD6* (1486 bp) and the length of the deleted fragment (853 bp, yielding a 633 bp PCR product). (bottom) The genotypes of selected *M. tuberculosis* mutants were confirmed by PCR. Lanes: 1, wild-type *M. tuberculosis*; 2, single crossover (SCO) strain carrying both wild-type and mutated genes; 3, one of the wild-type DCO strains exclusively found after selection. **(B)** (top) Schematic showing the region that was amplified in order to select proper  $\Delta accD6_{Mtb}-P_{fasII} accD6_{Mtb}$  and  $\Delta accD6_{Mtb}-P_{fasII} FASII_{Mtb}$  mutant strains. (bottom) The SCO strain was enriched with an intact *accD6* supplied on the pFD6Tb1 and pFASTb2 constructs. After further processing, DCO strains carrying wild-type *accD6* or  $\Delta accD6$  were obtained. Lanes: 1, wild-type *M. tuberculosis*; 2, SCO strain; 3,  $\Delta accD6_{Mtb}-P_{fasII} accD6_{Mtb}$ ; 4,  $\Delta accD6_{Mtb}-P_{fasII} FASII_{Mtb}$ .
