# Supplementary material
Source: PubMed Central journal article supplement (PMC3232849)
Supplement: supp_193.24.6960_TableS1.pdf [file supp_193.24.6960_TableS1.pdf]

**Table S1** Plasmids used in this study.

| Plasmid                                                               | Description                                                                                                                                                                                                                                                                                                     | Source or reference |
|-----------------------------------------------------------------------|-----------------------------------------------------------------------------------------------------------------------------------------------------------------------------------------------------------------------------------------------------------------------------------------------------------------|---------------------|
| <b>Cloning vectors:</b>                                               |                                                                                                                                                                                                                                                                                                                 |                     |
| pJET1.2/blunt                                                         | PCR products cloning vector, Amp <sup>R</sup>                                                                                                                                                                                                                                                                   | Fermentas           |
| p2NIL                                                                 | Recombination vector, nonreplicating in mycobacteria, Kan <sup>R</sup>                                                                                                                                                                                                                                          | (54)                |
| pGOAL17                                                               | Source of PacI marker cassette ( <i>sucB</i> , <i>lacZ</i> ), Amp <sup>R</sup>                                                                                                                                                                                                                                  | (54)                |
| pJam2                                                                 | Shuttle vector carrying inducible P <sub>ami</sub> promoter, Kan <sup>R</sup>                                                                                                                                                                                                                                   | (75)                |
| pMV306Km                                                              | Mycobacterial integrating vector, Kan <sup>R</sup>                                                                                                                                                                                                                                                              | Med-Immune Inc.     |
| pMV306Hyg                                                             | Mycobacterial integrating vector, Hyg <sup>R</sup>                                                                                                                                                                                                                                                              | Med-Immune Inc.     |
| pMV306Gm                                                              | pMV306Km vector with a defective Kan <sup>R</sup> gene (the Gm <sup>R</sup> gene cloned into the SmaI site of the Kan <sup>R</sup> gene), Gm <sup>R</sup>                                                                                                                                                       | This study          |
| pHIS.Parallel1                                                        | Protein expression vector, Amp <sup>R</sup>                                                                                                                                                                                                                                                                     | (69)                |
| <b>Vectors used for gene replacement:</b>                             |                                                                                                                                                                                                                                                                                                                 |                     |
| pJPD6Ms                                                               | p2NIL-based recombination vector carrying the 5' end of <i>M. smegmatis accD6</i> and its upstream flanking sequence (1762 bp) cloned next to the 3' end of <i>accD6</i> and its downstream flanking sequence (1237 bp), enriched with the PacI cassette from pGOAL17, Kan <sup>R</sup>                         | This study          |
| pJPD6Tb                                                               | p2NIL-based recombination vector carrying the <i>M. tuberculosis accD6</i> 5' end and its upstream flanking sequence (1595 bp) cloned next to the <i>accD6</i> 3' end and its downstream flanking sequence (1197 bp), enriched with the PacI cassette from pGOAL17, Kan <sup>R</sup>                            | This study          |
| <b>Vectors used for complementation in <i>M. tuberculosis</i>:</b>    |                                                                                                                                                                                                                                                                                                                 |                     |
| pFASTb                                                                | PCR fragment harboring the promoter of the <i>M. tuberculosis</i> FAS-II operon and the first 114 bp of the <i>fabD</i> gene cloned into the NotI/XbaI site of the pMV306Gm integrative vector                                                                                                                  | This study          |
| pFASTb1                                                               | PCR fragment carrying 795 bp of the 3' end of <i>fabD</i> , all of <i>acpM</i> and <i>kasA</i> , and the first 259 bp of <i>kasB</i> , cloned into the XbaI/EcoRI site of the pFASTb vector                                                                                                                     | This study          |
| pFASTb2                                                               | PCR fragment carrying 1058 bp of the <i>kasB</i> 3' end and the full-length <i>accD6</i> gene cloned into the EcoRI site of pFASTb1 to generate a vector harboring a reconstitution of the whole and continuous <i>M. tuberculosis</i> FAS-II gene cluster (P <sub>fasII</sub> FASII <sub>Mtb</sub> ) (Fig. 2A) | This study          |
| pFD6Tb                                                                | PCR fragment carrying the full-length sequence of <i>M. tuberculosis accD6</i> (Rv2247) (1486 bp) cloned into the XbaI/HindIII site of the pMV306Hyg integrative vector                                                                                                                                         | This study          |
| pFD6Tb1                                                               | pFD6Tb with PCR fragment carrying the FAS-II promoter (1028 bp), cloned into the NotI/XbaI site upstream of the <i>accD6</i> gene sequence (P <sub>fasII</sub> <i>accD6</i> <sub>Mtb</sub> ) (Fig. 2A)                                                                                                          | This study          |
| pPD6Tb                                                                | PCR fragment (2542 bp) carrying all of <i>accD6</i> (Rv2247) together with 1088 bp of upstream sequence (the 30 bp intergenic region and a 1058 bp fragment of <i>kasB</i> ), cloned into the EcoRI site of the pMV306Gm integrative vector (P <sub>acc</sub> <i>accD6</i> <sub>Mtb</sub> ) (Fig. 5B)           | This study          |
| <b>Vectors used for complementation in <i>M. smegmatis</i>:</b>       |                                                                                                                                                                                                                                                                                                                 |                     |
| pAceD6Ms                                                              | <i>accD6</i> <sub>Msm</sub> under the control of the P <sub>ami</sub> promoter in pJam2 vector, Kan <sup>R</sup> (P <sub>ami</sub> <i>accD6</i> <sub>Msm</sub> )                                                                                                                                                | This study          |
| pAceD6Tb                                                              | <i>accD6</i> <sub>Mtb</sub> under the control of the P <sub>ami</sub> promoter in pJam2 vector, Kan <sup>R</sup> (P <sub>ami</sub> <i>accD6</i> <sub>Mtb</sub> )                                                                                                                                                | This study          |
| pPD6Ms                                                                | PCR fragment (1637 bp) carrying all of <i>M. smegmatis accD6</i> (MSMEG_4329) and 180 bp of sequence upstream from the <i>accD6</i> start codon, cloned into the ClaI/EcoRI site of the pMV306Km vector                                                                                                         | This study          |
| pPD6Ms1                                                               | pPD6Ms with a PCR fragment (827 bp) upstream from the above-described 180 bp sequence, cloned into the ClaI site to generate pPD6Ms1 (P <sub>acc</sub> <i>accD6</i> <sub>Msm</sub> ) (Fig. 5A)                                                                                                                  | This study          |
| <b>Vector used for overexpression of AccD6<sub>Mtb</sub> protein:</b> |                                                                                                                                                                                                                                                                                                                 |                     |
| pHD6Tb                                                                | pHIS.Parallel1 expression vector with <i>accD6</i> <sub>Mtb</sub> cloned into the BamHI/HindIII site                                                                                                                                                                                                            | This study          |
