# Supplementary material
Source: PubMed Central journal article supplement (PMC3232849)
Supplement: supp_193.24.6960_TableS2.pdf [file supp_193.24.6960_TableS2.pdf]

**Table S2** Primers used for PCR amplification. Underlined regions indicate the restriction sites used during the cloning steps (BamHI GGATCC, ClaI ATCGAT, EcoRI GAATTC, HindIII AAGCTT, KpnI -GGTACC, PstI CTGCAG, XbaI TCTAGA).

| Primer                                                                           | Sequence                                        | Description                                                                                                              |
|----------------------------------------------------------------------------------|-------------------------------------------------|--------------------------------------------------------------------------------------------------------------------------|
| <b>Construction of the gene replacement vector for <i>M. tuberculosis</i>:</b>   |                                                 |                                                                                                                          |
| TBaccGR1                                                                         | F: 5' GGGGT <u>ACCG</u> CTCGCGCAGCGGCGTCATC     | GR1-GR2 PCR fragment of <i>accD6<sub>Mtb</sub></i>                                                                       |
| TBaccGR2                                                                         | R: 5' <u>CCCAAGCTT</u> CGCGGGGGTTCGAGCGACTCG    |                                                                                                                          |
| TBaccGR3                                                                         | F: 5' <u>CCCAAGCTT</u> CCGCTACGCCTGGCGGGCTCG    | GR3-GR4 PCR fragment of <i>accD6<sub>Mtb</sub></i>                                                                       |
| TBaccGR4                                                                         | R: 5' <u>AACTGCAGT</u> CGCGGCGCTCGCTGCTCAG      |                                                                                                                          |
| <b>Construction of the gene replacement vector for <i>M. smegmatis</i>:</b>      |                                                 |                                                                                                                          |
| MSaccGR1                                                                         | F: 5' GGGGT <u>ACCAAC</u> CGCCCTCGGGTTGCGG      | GR1-GR2 PCR fragment of <i>accD6<sub>Msm</sub></i>                                                                       |
| MSaccGR2                                                                         | R: 5' <u>GCAAGCTT</u> CAGCACACCGGAGCGGTCACG     |                                                                                                                          |
| MSaccGR3                                                                         | F: 5' <u>GCAAGCTT</u> CGCGTTCGCGCTACGATGTG      | GR3-GR4 PCR fragment of <i>accD6<sub>Msm</sub></i>                                                                       |
| MSaccGR4                                                                         | R: 5' <u>AACTGCAG</u> CGGATCGCCGAAACCCAG        |                                                                                                                          |
| <b>Construction of the complementation vectors for <i>M. tuberculosis</i>:</b>   |                                                 |                                                                                                                          |
| TbP-fas2-Not-nat                                                                 | F: 5' CCGATGCGGCGGAGGCAC                        | pFASTb2 and pFD6Tb1 vector construction                                                                                  |
| TbP-fas2-Xba-nat                                                                 | R: 5' ATGGCTGGGCGACCGCGG                        |                                                                                                                          |
| Tb-fas2-sense-Xb                                                                 | F: 5' CGGCGCAGCGGACCAGATC                       | pFASTb2 vector construction                                                                                              |
| Tb-fas2-reve-Ec                                                                  | R: 5' CCGCGTCAGCTGGTGGTCCG                      |                                                                                                                          |
| Tb-fas2-senEcoRI                                                                 | F: 5' GCCAAAGCGGGATCCGTACG                      | pFASTb2 and pPD6Tb vector construction                                                                                   |
| Tb-fas2-revEcoRI                                                                 | R: 5' GGAATTCGCGTGCATTCTCGGCTCTGC               |                                                                                                                          |
| TBaccD6-Xbals                                                                    | F: 5' GCTCTAGACTAAACCCAGCGTTACGCGAC             | pFD6Tb1 vector construction, SCO/DCO mutant screening, Southern blot probe synthesis                                     |
| TBaccD6-HindIIIrev                                                               | R: 5' GAAGCTTGTGCGATTCTCGTCTGCTCG               |                                                                                                                          |
| <b>Construction of the complementation vectors for <i>M. smegmatis</i>:</b>      |                                                 |                                                                                                                          |
| MsaccD6Xs                                                                        | F: 5' GCTCTAGAAATGACGATCATGGCCCGG               | pAceD6Ms vector construction, SCO/DCO mutant screening, Southern blot probe synthesis                                    |
| MsaccD6Xr                                                                        | R: 5' GCTCTAGATTACAGCGGGATGTTCTTTGTGGC          | pAceD6Ms vector construction                                                                                             |
| MsaccD6HXr                                                                       | R: 5' GCTCTAGAAAGCTTACAGCGGGATGTTCTTTGTGGC      | $\Delta$ <i>accD6</i> mutant confirmation, Southern blot probe synthesis                                                 |
| TBaccD6B                                                                         | F: 5' CGGGATCCATGACAATCATGGCCCGG                | pAceD6Tb vector construction                                                                                             |
| TBaccD6X                                                                         | R: 5' GCTCTAGATTACAGCGGGATGTTCTTTGTGGC          |                                                                                                                          |
| MsD6Cns                                                                          | F: 5' GCGGTCGAATCCATCCTGA                       | pPD6Ms1 vector construction                                                                                              |
| MsD6prEr                                                                         | R: 5' GGAATTCGAGCAGTTTTGCGTCTGTTCCG             |                                                                                                                          |
| MsD6PCls                                                                         | F: 5' CCATCGATCGTCTCATGGTGTGCGATGGGCA           | pPD6Ms1 vector construction                                                                                              |
| MsD6nCr                                                                          | R: 5' GCTGACGGCCCTCGAAGAAACATTC                 |                                                                                                                          |
| <b>Construction of the vector for <i>AccD6<sub>Mtb</sub></i> overexpression:</b> |                                                 |                                                                                                                          |
| TBaccD6s                                                                         | F: 5' CGGGATCCGATGACAATCATGGCCCGG               | pHD6Tb vector construction                                                                                               |
| TBaccD6r                                                                         | R: 5' <u>CCCAAGCTT</u> CTACAGCGGGATGTTCTTTGTGGC |                                                                                                                          |
| <b>qRT-PCR primers for <i>M. smegmatis</i>:</b>                                  |                                                 |                                                                                                                          |
| <i>accD1</i> (MSMEG_4717)                                                        | F: 5' GGTGAAAGGCGGGACGTACTACCC                  | R: 5' GAGTCCACGAGATAGATGCACGG                                                                                            |
| <i>accD2</i> (MSMEG_5492)                                                        | F: 5' ATCCCTGGACGCTCAAGAAGATCCT                 | R: 5' TGAAGATCTTTCTGCGTCGGCA                                                                                             |
| <i>accD3</i> (MSMEG_5642)                                                        | F: 5' AGCACGGTTGGCTGTCCCTCTTTC                  | R: 5' AGGTCTGTGCGAGCGCACGCGCTTG                                                                                          |
| <i>accD4</i> (MSMEG_6391)                                                        | F: 5' GCACTCGGAATGCCCTTCTTCTC                   | R: 5' ACGAACAAGACCACCGCTGAACTC                                                                                           |
| <i>accD5</i> (MSMEG_1813)                                                        | F: 5' GAAGTTGGTGTGCTGCGATGCTTGGC                | R: 5' GGTGCACGCCAAAGGCAAACTCAC                                                                                           |
| <i>accD6</i> (MSMEG_4329)                                                        | F: 5' CCTGCTGGCAGAACAATCCGACCA                  | R: 5' GGAGGCTCACACAAGAAGTCCGG                                                                                            |
| <i>sigA</i>                                                                      | F: 5' AGGGCTACAAGTTCTCGACCTACGCG                | R: 5' CCGAGCTTGTGATCACCTCGACC                                                                                            |
| <b>qRT-PCR primers for <i>M. tuberculosis</i>: Daniel et al., 2006 (18)</b>      |                                                 |                                                                                                                          |
| <b>PCR analysis of the FAS-II gene cluster in <i>M. smegmatis</i>:</b>           |                                                 |                                                                                                                          |
| Ms-fabD-s-pol                                                                    | F: 5' GCCACGCTGCGTGATCGCTTC                     | amplification of <i>fabD-acpM</i> intergenic region - 1                                                                  |
| Ms-acpM-r-pol                                                                    | R: 5' CGACTTCTCCGGGGTGACCTCG                    |                                                                                                                          |
| Ms-acpM-s-pol                                                                    | F: 5' GGACGAGGATCTGGCCGGTTC                     | amplification of <i>acpM-kasA</i> intergenic region - 2                                                                  |
| Ms-kasA-r-pol                                                                    | R: 5' CGGCAGTCCCACTTGGTG                        |                                                                                                                          |
| Ms-kasA-s-pol                                                                    | F: 5' CTCTCCGCGACGGCGTCATC                      | amplification of <i>kasA-kasB</i> intergenic region - 3                                                                  |
| Ms-kasB-r-pol                                                                    | R: 5' GGCCGTCGAGCAGCTTCTTCC                     |                                                                                                                          |
| Ms-kasB-s-pol                                                                    | F: 5' CGATCTGGATGTTGTGCGCG                      | amplification of <i>kasB-accD6</i> intergenic region - 4, confirmation of <i>accD6<sub>Msm</sub></i> deletion (Fig. S3B) |
| Ms-accD6-r-pol                                                                   | R: 5' TCGAAGAACGTGCTCAGGCG                      |                                                                                                                          |
| MsD6pr2                                                                          | R: 5' GGCTCTGCTCCTCGATCGCG                      | confirmation of <i>accD6<sub>Msm</sub></i> deletion (Fig. S3B)                                                           |
| <b>PCR analysis of the FAS-II gene cluster in <i>M. tuberculosis</i>:</b>        |                                                 |                                                                                                                          |
| Tb-fabD-s-pol                                                                    | 5' ACAGTCACGGCGATCGTGGAGTTC                     | amplification of <i>fabD-acpM</i> intergenic region - 1                                                                  |
| Tb-acpM-r-pol                                                                    | 5' CGAAGACTTCTCCGGGGTGATCT                      |                                                                                                                          |
| Tb-acpM-s-pol                                                                    | 5' GGACAAGTACGGCGTCAAGATCCC                     | amplification of <i>acpM-kasA</i> intergenic region - 2                                                                  |
| Tb-kasA-r-pol                                                                    | 5' TGAGGTGACCGCCGATCTTGAC                       |                                                                                                                          |
| Tb-kasA-s-pol                                                                    | 5' CCCTGAACACTACGAGACACCCGATCC                  | amplification of <i>kasA-kasB</i> intergenic region - 3                                                                  |
| Tb-kasB-r-pol                                                                    | 5' GCCGGTGACACTACGTAGGGAAA                      |                                                                                                                          |
| Tb-kasB-s-pol                                                                    | 5' TCGATTTGGACGTGGTGGCG                         | amplification of <i>kasB-accD6</i> intergenic region - 4                                                                 |
| Tb-accD6-r-pol                                                                   | 5' CACGCTCGTGCAGCAATTCCAC                       |                                                                                                                          |
